# Supplementary material
Source: publisher figshare collection journal article supplement (https://frontiersin.figshare.com/ndownloader/files/18525746)
Supplement: Supplementary file [file 18525746]

## Supplemental Materials

Table S1 mRNA variants of *NAT1* and the CpG sites of *NAT1* methylation

| mRNA variants | CpG sites                                                              |
|---------------|------------------------------------------------------------------------|
| NM_000662     | cg04149472; cg21363706; cg04241863; cg15797286; cg15138846; cg21172319 |
| NM_001160170  | cg04149472; cg21363706; cg04241863; cg15797286; cg15138846; cg21172319 |
| NM_001160171  | cg04149472; cg21363706; cg04241863; cg15797286; cg15138846; cg21172319 |
| NM_001160172  | cg04149472; cg21363706; cg04241863; cg15797286; cg15138846; cg21172319 |
| NM_001160173  | cg04149472; cg21363706; cg04241863; cg15797286; cg15138846; cg21172319 |
| NM_001160174  | cg07470176; cg09102997; cg22904102                                     |
| NM_001160175  | cg04149472; cg21363706; cg04241863; cg15797286; cg15138846; cg21172319 |
| NM_001160176  | cg04149472; cg21363706; cg04241863; cg15797286; cg15138846; cg21172319 |
| NM_001160179  | cg19721541; cg06450790; cg21298408; cg02041869                         |

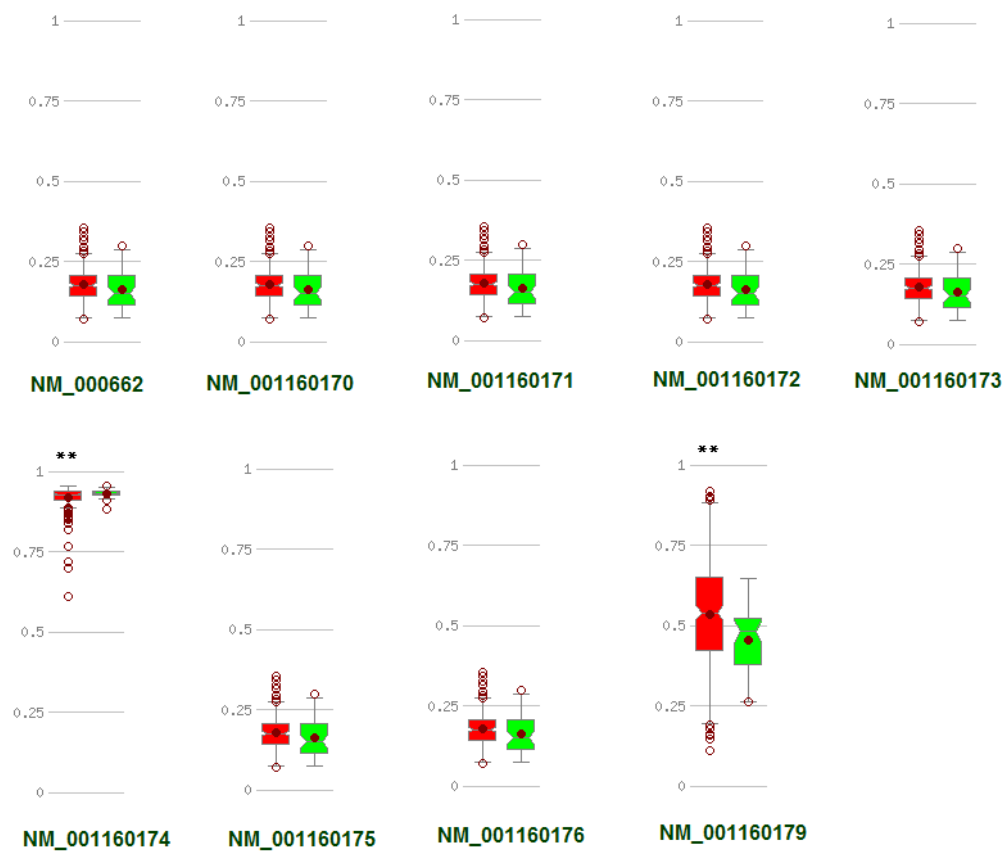

Figure S1 Comparison of methylation values of nine *NAT1* gene variants between tumor and normal tissue of COAD. Results were from MethHC website (<http://methhc.mbc.nctu.edu.tw>). Methylation of

NM\_001160179 and NM\_001160179 were significantly increased in COAD tissues compared with normal tissues. \*\*P<0.001.
